# Supplementary material for: Maternal Zinc, Copper, and Selenium Intakes during Pregnancy and Congenital Heart Defects
Source: MDPI journal article supplement (doi:10.3390/nu14051055), 2022-03-02
Supplement: s1 [file s1]

**Table S1.** Quartiles of maternal dietary zinc, copper, and selenium intakes during pregnancy and congenital heart defects.

| Cutoffs                          | Total CHDs ( <i>N</i> <sub>cases</sub> =474) |                                  | VSD ( <i>N</i> <sub>cases</sub> =223) |                                  | ASD ( <i>N</i> <sub>cases</sub> =218) |                                  |
|----------------------------------|----------------------------------------------|----------------------------------|---------------------------------------|----------------------------------|---------------------------------------|----------------------------------|
|                                  | Cases/Controls                               | Adjusted OR (95%CI) <sup>1</sup> | Adjusted OR (95%CI) <sup>1</sup>      | Adjusted OR (95%CI) <sup>1</sup> | Adjusted OR (95%CI) <sup>1</sup>      | Adjusted OR (95%CI) <sup>1</sup> |
| Dietary zinc intake (mg/d)       |                                              |                                  |                                       |                                  |                                       |                                  |
| Quartile 1                       | <4.64                                        | 231/237                          | 1                                     | 1                                | 1                                     | 1                                |
| Quartile 2                       | 4.64-6.38                                    | 101/237                          | 0.44 (0.33, 0.59)                     | 0.56 (0.37, 0.83)                | 0.56 (0.29, 1.10)                     | 0.54 (0.32, 0.89)                |
| Quartile 3                       | 6.38-9.08                                    | 83/237                           | 0.36 (0.26, 0.49)                     | 0.56 (0.33, 0.93)                | 0.52 (0.31, 0.88)                     | 0.51 (0.27, 0.95)                |
| Quartile 4                       | ≥9.08                                        | 59/237                           | 0.26 (0.18, 0.36)                     | 0.32 (0.15, 0.69)                | 0.23 (0.08, 0.66)                     | 0.33 (0.12, 0.91)                |
| <i>P</i> for trend <sup>2</sup>  |                                              |                                  | <0.001                                | 0.007                            | 0.020                                 | 0.029                            |
| Dietary copper intake (mg/d)     |                                              |                                  |                                       |                                  |                                       |                                  |
| Quartile 1                       | <1.25                                        | 142/237                          | 1                                     | 1                                | 1                                     | 1                                |
| Quartile 2                       | 1.25-1.86                                    | 158/237                          | 1.11 (0.83, 1.49)                     | 1.37 (0.96, 1.94)                | 1.39 (0.88, 2.21)                     | 1.18 (0.75, 1.86)                |
| Quartile 3                       | 1.86-2.49                                    | 114/237                          | 0.80 (0.59, 1.09)                     | 1.64 (1.08, 2.49)                | 2.09 (1.21, 3.60)                     | 1.54 (0.91, 2.61)                |
| Quartile 4                       | ≥2.49                                        | 60/237                           | 0.42 (0.30, 0.60)                     | 0.94 (0.54, 1.65)                | 1.23 (0.58, 2.64)                     | 0.86 (0.42, 1.78)                |
| <i>P</i> for trend <sup>2</sup>  |                                              |                                  | <0.001                                | 0.470                            | 0.125                                 | 0.709                            |
| Dietary selenium intake (mg/d)   |                                              |                                  |                                       |                                  |                                       |                                  |
| Quartile 1                       | <21.90                                       | 224/237                          | 1                                     | 1                                | 1                                     | 1                                |
| Quartile 2                       | 21.90-30.89                                  | 113/237                          | 0.50 (0.38, 0.67)                     | 0.66 (0.46, 0.95)                | 0.58 (0.36, 0.93)                     | 0.69 (0.43, 1.10)                |
| Quartile 3                       | 30.89-43.70                                  | 84/237                           | 0.38 (0.28, 0.51)                     | 0.57 (0.36, 0.90)                | 0.49 (0.27, 0.89)                     | 0.56 (0.31, 1.01)                |
| Quartile 4                       | ≥43.70                                       | 53/237                           | 0.24 (0.17, 0.34)                     | 0.33 (0.17, 0.63)                | 0.15 (0.06, 0.40)                     | 0.26 (0.11, 0.64)                |
| <i>P</i> for trend <sup>2</sup>  |                                              |                                  | <0.001                                | 0.001                            | <0.001                                | 0.006                            |
| Dietary zinc to copper ratio     |                                              |                                  |                                       |                                  |                                       |                                  |
| Quartile 1                       | <2.99                                        | 216/237                          | 1                                     | 1                                | 1                                     | 1                                |
| Quartile 2                       | 2.99-3.60                                    | 86/237                           | 0.40 (0.29, 0.54)                     | 0.60 (0.42, 0.85)                | 0.70 (0.45, 1.10)                     | 0.72 (0.46, 1.13)                |
| Quartile 3                       | 3.60-4.47                                    | 75/237                           | 0.35 (0.25, 0.48)                     | 0.55 (0.37, 0.79)                | 0.53 (0.32, 0.87)                     | 0.57 (0.35, 0.93)                |
| Quartile 4                       | ≥4.47                                        | 97/237                           | 0.45 (0.33, 0.61)                     | 0.61 (0.43, 0.87)                | 0.50 (0.31, 0.79)                     | 0.71 (0.45, 1.11)                |
| <i>P</i> for trend <sup>2</sup>  |                                              |                                  | <0.001                                | 0.003                            | 0.001                                 | 0.079                            |
| Dietary selenium to copper ratio |                                              |                                  |                                       |                                  |                                       |                                  |
| Quartile 1                       | <13.68                                       | 204/237                          | 1                                     | 1                                | 1                                     | 1                                |
| Quartile 2                       | 13.68-17.18                                  | 103/237                          | 0.50 (0.37, 0.68)                     | 0.65 (0.46, 0.92)                | 0.63 (0.41, 0.99)                     | 0.93 (0.61, 1.42)                |
| Quartile 3                       | 17.18-21.71                                  | 80/237                           | 0.39 (0.29, 0.54)                     | 0.50 (0.35, 0.73)                | 0.41 (0.25, 0.66)                     | 0.50 (0.31, 0.81)                |
| Quartile 4                       | ≥21.71                                       | 87/237                           | 0.43 (0.31, 0.58)                     | 0.54 (0.38, 0.78)                | 0.41 (0.25, 0.66)                     | 0.55 (0.34, 0.88)                |
| <i>P</i> for trend <sup>2</sup>  |                                              |                                  | <0.001                                | <0.001                           | <0.001                                | 0.002                            |
| Dietary zinc to selenium ratio   |                                              |                                  |                                       |                                  |                                       |                                  |
| Quartile 1                       | <0.18                                        | 121/237                          | 1                                     | 1                                | 1                                     | 1                                |
| Quartile 2                       | 0.18-0.21                                    | 115/237                          | 0.83 (0.60, 1.14)                     | 0.82 (0.56, 1.19)                | 0.68 (0.41, 1.14)                     | 0.98 (0.61, 1.58)                |
| Quartile 3                       | 0.21-0.23                                    | 118/237                          | 0.85 (0.62, 1.17)                     | 0.86 (0.59, 1.26)                | 1.04 (0.64, 1.69)                     | 0.88 (0.54, 1.44)                |
| Quartile 4                       | ≥0.23                                        | 120/237                          | 1.24 (0.92, 1.67)                     | 0.99 (0.63, 1.56)                | 1.02 (0.65, 1.60)                     | 0.98 (0.65, 1.60)                |
| <i>P</i> for trend <sup>2</sup>  |                                              |                                  | 0.139                                 | 0.230                            | 0.310                                 | 0.190                            |

ASD, atrial septal defects; CHDs, congenital heart defects; VSD, ventricular septal defects.

<sup>1</sup> Models are adjusted for total energy intake during pregnancy, socio-demographic characteristics (maternal age, residence, education, work, and parity), maternal health-related factors in the first trimester (folate/iron supplements use, passive smoking, medication use, and anemia), and dietary diversity score. Models are additionally adjusted for maternal supplements uses of zinc, copper, and selenium in the associations between dietary intakes of corresponding minerals and CHDs.

<sup>2</sup> *P* for trend across quartiles is calculated using the median for each quartile as a continuous variable.

**Table S2.** Maternal dietary zinc, copper, and selenium intakes categorized by the recommended nutrient intakes (RNIs) during pregnancy and congenital heart defects.

|                         |                | Total CHDs ( <i>N</i> <sub>cases</sub> =474) |                                     | VSD ( <i>N</i> <sub>cases</sub> =223) | ASD ( <i>N</i> <sub>cases</sub> =218) |
|-------------------------|----------------|----------------------------------------------|-------------------------------------|---------------------------------------|---------------------------------------|
|                         | Cases/Controls | Adjusted<br>OR (95%CI) <sup>1</sup>          | Adjusted<br>OR (95%CI) <sup>1</sup> | Adjusted<br>OR (95%CI) <sup>1</sup>   | Adjusted<br>OR (95%CI) <sup>1</sup>   |
| Dietary zinc intake     |                |                                              |                                     |                                       |                                       |
| Below the RNI           | 423/736        | 1                                            | 1                                   | 1                                     | 1                                     |
| Met the RNI             | 51/212         | 0.42 (0.30, 0.58)                            | 0.67 (0.49, 0.93)                   | 0.54 (0.26, 1.12)                     | 0.82 (0.42, 1.60)                     |
| <i>P</i>                |                | <0.001                                       | 0.016                               | 0.099                                 | 0.565                                 |
| Dietary copper intake   |                |                                              |                                     |                                       |                                       |
| Below the RNI           | 74/105         | 1                                            | 1                                   | 1                                     | 1                                     |
| Met the RNI             | 400/843        | 0.69 (0.41, 1.17)                            | 1.24 (0.83, 1.87)                   | 1.22 (0.72, 2.06)                     | 1.05 (0.63, 1.74)                     |
| <i>P</i>                |                | 0.166                                        | 0.295                               | 0.451                                 | 0.860                                 |
| Dietary selenium intake |                |                                              |                                     |                                       |                                       |
| Below the RNI           | 463/852        | 1                                            | 1                                   | 1                                     | 1                                     |
| Met the RNI             | 11/96          | 0.21 (0.11, 0.40)                            | 0.18 (0.08, 0.42)                   | 0.15 (0.05, 0.51)                     | 0.18 (0.06, 0.50)                     |
| <i>P</i>                |                | <0.001                                       | <0.001                              | 0.002                                 | 0.001                                 |

ASD, atrial septal defects; CHDs, congenital heart defects; VSD, ventricular septal defects.

<sup>1</sup> Models are adjusted for total energy intake during pregnancy, socio-demographic characteristics (maternal age, residence, education, work, and parity), maternal health-related factors in the first trimester (folate/iron supplements use, passive smoking, medication use, and anemia), and dietary diversity score. Models are additionally adjusted for maternal supplements uses of zinc, copper, and selenium in the associations between dietary intakes of corresponding minerals and CHDs.

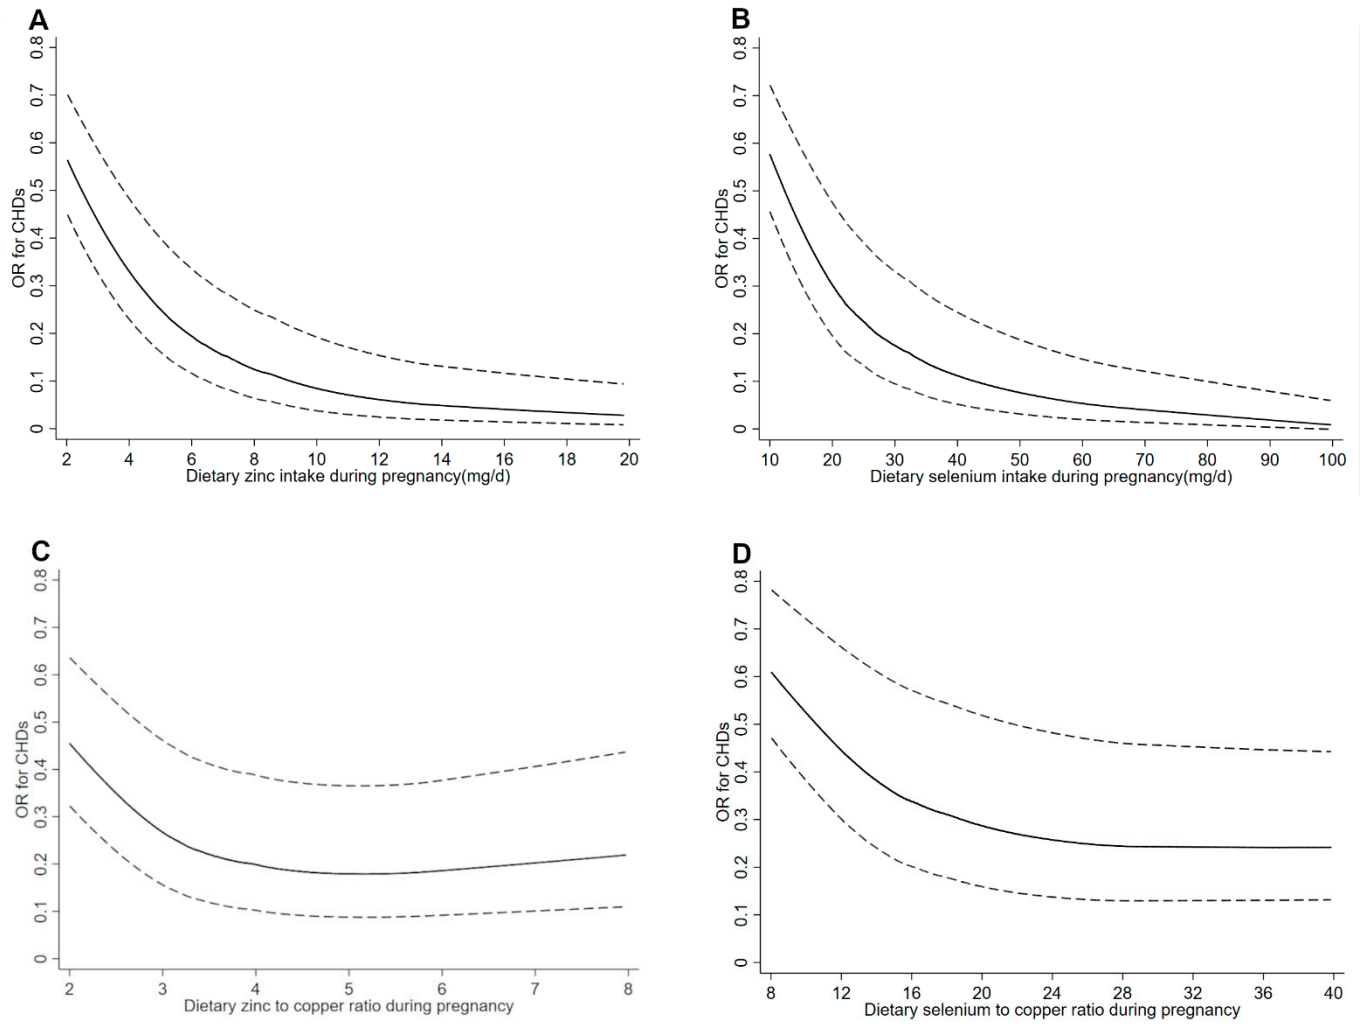

**Figure S1.** Restricted cubic spline models of total congenital heart defects (CHDs) risk associated with (A) dietary zinc intake, (B) dietary selenium intake, (C) dietary zinc to copper ratio, and (D) dietary selenium to copper ratio during pregnancy. Models are adjusted for total energy intake during pregnancy, socio-demographic characteristics (maternal age, residence, education, work, and parity), maternal health-related factors in the first trimester (folate/iron supplements use, passive smoking, medication use, and anemia), and dietary diversity score. Models are additionally adjusted for maternal supplements uses of zinc, copper, and selenium in the associations between dietary intakes of corresponding minerals and CHDs.

**Table S3.** Maternal zinc, copper, and selenium supplements uses during pregnancy and congenital heart defects.

|                                                 | Total CHDs ( <i>N</i> <sub>cases</sub> =474) |          | VSD ( <i>N</i> <sub>cases</sub> =223) |          | ASD ( <i>N</i> <sub>cases</sub> =218) |          |
|-------------------------------------------------|----------------------------------------------|----------|---------------------------------------|----------|---------------------------------------|----------|
|                                                 | OR (95%CI)                                   | <i>P</i> | OR (95%CI)                            | <i>P</i> | OR (95%CI)                            | <i>P</i> |
| Zinc supplements use during pregnancy           | 0.53 (0.37, 0.76)                            | 0.001    | 0.51 (0.31, 0.82)                     | 0.006    | 0.43 (0.26, 0.69)                     | 0.001    |
| Zinc supplements use in the first trimester     | 0.58 (0.38, 0.91)                            | 0.016    | 0.62 (0.34, 1.13)                     | 0.118    | 0.49 (0.27, 0.91)                     | 0.023    |
| Copper supplements use during pregnancy         | 0.52 (0.26, 1.04)                            | 0.065    | 0.62 (0.24, 1.63)                     | 0.332    | 0.56 (0.22, 1.48)                     | 0.244    |
| Copper supplements use in the first trimester   | 0.46 (0.15, 1.43)                            | 0.180    | 0.49 (0.11, 2.22)                     | 0.357    | 0.52 (0.11, 2.51)                     | 0.416    |
| Selenium supplements use during pregnancy       | 0.45 (0.30, 0.68)                            | <0.001   | 0.46 (0.26, 0.80)                     | 0.006    | 0.38 (0.22, 0.66)                     | 0.001    |
| Selenium supplements use in the first trimester | 0.52 (0.31, 0.85)                            | 0.010    | 0.59 (0.31, 1.13)                     | 0.113    | 0.54 (0.27, 1.05)                     | 0.071    |

Models are adjusted for total energy intake during pregnancy, socio-demographic characteristics (maternal age, residence, education, work, and parity), maternal health-related factors in the first trimester (folate/iron supplements use, passive smoking, medication use, and anemia), and dietary diversity score. Models are additionally adjusted for maternal dietary intakes of zinc, copper, and selenium in the associations between supplements uses of corresponding minerals and CHDs.
